# Supplementary material for: The Effect of Water Stress on the Glucosinolate Content and Profile: A Comparative Study on Roots and Leaves of Brassica oleracea L. Crops
Source: MDPI journal article supplement (doi:10.3390/agronomy13020579), 2023-02-17
Supplement: s1 [file s1]

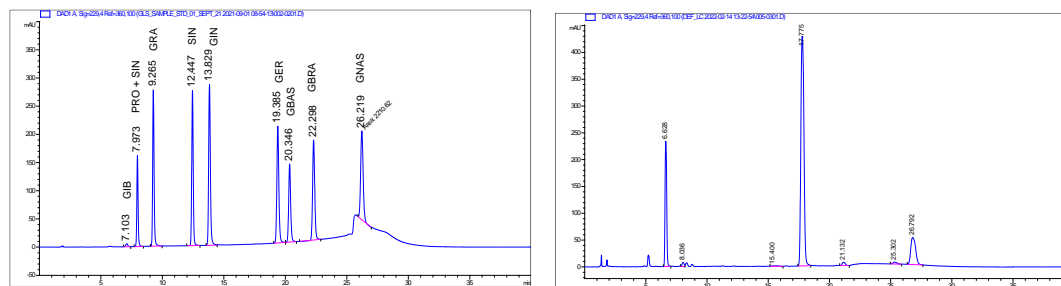

**Figure S1.** High performance liquid chromatography (HPLC) chromatograms of desulfo-GSLs standards (A) and kale sample extract (B). Peak identification SIN = sinigrin, GER = glucoeuricin , GAL = glucoalyssin, GNA = gluconapin, GBN = glucobrassicinapin, GBS = glucobrassicin, GRA = glucoraphanin, NGBS = neoglucobrassicin, SIB Sinalbin , and GNS = gluconasturtiin.

**Table S1.** Variation in the aliphatic glucosinolates content ( $\mu\text{mol g}^{-1} \text{d.w.}$ ) in roots in relation to the two experimental factors studied.

| Genotype | SIN     |          |         | GRA      |          |          | GNA     |         |          | GER     |          |          | GBN     |          |          | GAL     |          |         |
|----------|---------|----------|---------|----------|----------|----------|---------|---------|----------|---------|----------|----------|---------|----------|----------|---------|----------|---------|
|          | IRR     | NIR      | Mean    | IRR      | NIR      | Mean     | IRR     | NIR     | Mean     | IRR     | NIR      | Mean     | IRR     | NIR      | Mean     | IRR     | NIR      | Mean    |
| BH 1     | 1.1±0.8 | 1.3±1.6  | 1.2±0.1 | 0.3± 0.1 | 1.4±0.4  | 0.9±0.3  | 1.3±0.7 | 0.0±0.0 | 0.6±0.4  | 0.2±0.0 | 0.0±0.0  | 0.08±0.0 | 0.8±0.0 | 2.2±1.4  | 1.5±0.7  | 0.8±0.4 | 0.4±0.0  | 0.6±0.2 |
| BH 2     | 1.3±0.5 | 0.8±0.4  | 1.1±0.4 | 0.4± 0.2 | 0.2± 0.0 | 0.3±0.1  | 0.2±0.0 | 0.2±0.0 | 0.2±0.0  | 0.7±0.0 | 6.9± 0.0 | 3.8±0.0  | 1.5±0.1 | 2.6±1.6  | 2.1±0.9  | 1.3±0.9 | 1.6± 0.0 | 1.5±0.5 |
| BH 3     | 0.7±0.3 | 1.3±0.6  | 1±0.4   | 0.5± 0.0 | 0.3±0.1  | 0.4±0.1  | 0.7±0.1 | 0.4±0.0 | 0.6±0.1  | 0.0±0.0 | 0.0±0.0  | 0.0±0.0  | 0.8±0.2 | 0.3 ±0.0 | 0.6±0.1  | 0.5±0.1 | 0.5±0.0  | 0.5±0.1 |
| BR 1     | 0.5±0.1 | 1.1±0.0  | 0.8±0.4 | 0.8±0.1  | 1.0±0.0  | 0.9±0.1  | 0.0±0.0 | 1.0±0.0 | 0.5±0.0  | 0.0±0.0 | 0.1±0.0  | 0.1±0.0  | 1.5±0.0 | 0.3±0.0  | 0.9±0.0  | 0.4±0.0 | 0.5±0.0  | 0.5±0.0 |
| BR 2     | 0.0±0.0 | 1.3±0.0  | 0.7±0.9 | 0.4±0.0  | 0.8±0.0  | 0.6±0.0  | 0.0±0.0 | 0.0±0.0 | 0.0±0.0  | 0.0±0.0 | 2.2±0.0  | 1.1±0.0  | 0.8±0.2 | 1.3±0.0  | 1.1±0.1  | 7.6±0.9 | 0.6±0.2  | 4.1±0.5 |
| BR 3     | 1.0±0.5 | 5.5±0.7  | 3.3±3.2 | 0.3±0.1  | 1.2±0.4  | 0.8±0.3  | 0.6±0.0 | 0.0±0.0 | 0.3± 0.0 | 0.0±0.0 | 0.3±0.0  | 0.2±0.0  | 1.3±0.2 | 3.3±1.5  | 2.3±0.9  | 0.3±0.0 | 15.7±8.2 | 8.0±4.1 |
| BR 4     | 9.2±2.8 | 10.8±4.8 | 10±1.1  | 0.0±0.0  | 0.0±0.0  | 0.0±0.0  | 0±0     | 0.0±0.0 | 0.0±0.0  | 0.1±0.0 | 1.6±0.1  | 0.9±0.1  | 3.0±2.3 | 12.5±0.1 | 12.5±1.2 | 5.8±2.1 | 8.6±0.7  | 7.2±1.4 |
| BR 5     | 3.6±2.7 | 0.4±0.0  | 2.1±2.3 | 1.0±0.7  | 0.5±0.1  | 0.8±0.4  | 0.4±0.1 | 0.0±0.0 | 0.2± 0.1 | 1.3±0.6 | 7.1±0.1  | 4.2±0.4  | 1.7±1.0 | 1.6±0.2  | 1.7±0.6  | 0.0±0.0 | 0.0±0.0  | 0.0±0.0 |
| CCP 1    | 0.2±0.0 | 0.4±0.1  | 0.3±0.1 | 0.2±0.0  | 0.4±0.1  | 0.3±0.01 | 0.1±0.0 | 0.1±0.0 | 0.1± 0.0 | 0.1±0.0 | 0.0±0.0  | 0.1±0.0  | 0.6±0.2 | 0.3±0.1  | 0.5±0.2  | 0.5±0.0 | 0.7±0.1  | 0.6±0.1 |
| CCP 2    | 2.0±0.4 | 0.9±0.6  | 1.5±0.8 | 0.0±0.0  | 0.5 ±0.1 | 0.3±0.02 | 0.7±0.3 | 1.6±0.4 | 1.2±0.4  | 0.6±0.1 | 0.9±0.6  | 0.8±0.4  | 0.7±0.3 | 0.0±0.0  | 0.4±0.2  | 0.3±0.0 | 0.8±0.5  | 0.6±0.3 |
| CCP 3    | 2.1±0.2 | 0.0±0.0  | 1.1±1.5 | 7.1±6.8  | 1.3±0.9  | 4.2±3.9  | 0.4±0.1 | 0.9±0.2 | 0.7±0.2  | 0.0±0.0 | 0.9±0.1  | 0.5±0.1  | 0.8±0.2 | 3.0±2.1  | 1.9±1.2  | 0.2±0.0 | 0.0±0.0  | 0.1±0.0 |
| CCP 4    | 0.0±0.0 | 0.0±0.0  | 0.0±0.0 | 0.3±0.2  | 1±0.0    | 0.7±0.1  | 0.2±0.1 | 0.0±0.0 | 0.1±0.1  | 0.2±0.1 | 0.0±0.0  | 0.1±0.1  | 0.8±0.1 | 2.3±1.6  | 1.6±0.9  | 0.6±0.1 | 2.3±1.1  | 1.5±0.6 |
| CV 1     | 0.0±0.0 | 0.3±0.0  | 0.2±0.2 | 0.2±0.1  | 0.4±0.1  | 0.3±0.1  | 0.2±0.1 | 0.6±0.2 | 0.4±0.1  | 0.0±0.0 | 0.0±0.0  | 0.0±0.0  | 0.7±0.2 | 0.5± 0.1 | 0.6±0.2  | 0.0±0.0 | 1.6±0.6  | 0.8±0.3 |
| CV 2     | 0.4±0.0 | 1.3±0.7  | 0.9±0.6 | 0.6±0.4  | 0.7±0.5  | 0.7±0.6  | 0.2±0.1 | 0.3±0.2 | 0.3±0.2  | 0.0±0.0 | 0.2±0.1  | 0.1±0.1  | 0.8±0.1 | 0.2±0.1  | 0.5±0.1  | 0.8±0.3 | 3.7±3.0  | 2.3±1.7 |
| CV 3     | 0.2±0.1 | 0.5±0.5  | 0.4±0.2 | 0.3±0.1  | 0.3±0.2  | 0.3±0.2  | 0.3±0.2 | 0.2±0.2 | 0.2±0.2  | 0.0±0.0 | 0.1±0.1  | 0.1±0.1  | 0.0±0.0 | 0.1±0.1  | 0.1±0.1  | 0.9±0.1 | 0.3±0.1  | 0.6±0.1 |
| CV 4     | 1.8±0.9 | 2.6±1.8  | 2.2±0.6 | 0.7±0.0  | 0.3±0.1  | 0.5±0.1  | 0.3±0.2 | 1.0±0.9 | 0.6±0.6  | 0.0±0.0 | 0.5±0.1  | 0.3±0.1  | 0.0±0.0 | 0.7±0.5  | 0.4±0.3  | 1.3±0.7 | 1.1±0.1  | 1.2±0.4 |
| CV 5     | 0.0±0.0 | 1.0± 0.3 | 0.5±0.7 | 0.2±0.1  | 0.5±0.2  | 0.4±0.2  | 0.5±0.0 | 0.4±0.2 | 0.5±0.1  | 0.0±0.0 | 0.9±0.0  | 0.5±0.0  | 0.0±0.0 | 1.6±0.3  | 0.8±0.2  | 2.2±1.1 | 1.1±0.1  | 1.7±0.6 |
| Mean     | 1.4±0.5 | 1.7±0.7  |         | 0.8±0.5  | 0.6±0.2  |          | 0.4±0.1 | 0.4±0.1 |          | 0.2±0.1 | 1.3±0.1  |          | 0.8±0.3 | 1.9±0.6  |          | 1.4±0.4 | 2.3±0.9  |         |

**Significancy of the differences by ANOVA Student–Newman–Keuls**

|         |     |  |      |  |      |  |     |  |      |  |     |
|---------|-----|--|------|--|------|--|-----|--|------|--|-----|
| IR      | *** |  | n.s. |  | n.s. |  | **  |  | n.s. |  | **  |
| GE      | *** |  | ***  |  | ***  |  | *** |  | ***  |  | *** |
| IR x GE | *** |  | ***  |  | ***  |  | *** |  | ***  |  | *** |

**Table S2.** Variation in the indolic and aromatic glucosinolates content ( $\mu\text{mol g}^{-1} \text{d.w.}$ ) in roots in relation to the two experimental factors studied.

| Genotype                                                      | GBS      |          |         | NGBS    |          |         | SIB     |          |         | GST      |          |          |
|---------------------------------------------------------------|----------|----------|---------|---------|----------|---------|---------|----------|---------|----------|----------|----------|
|                                                               | IRR      | NIR      | Mean    | IRR     | NIR      | Mean    | IRR     | NIR      | Mean    | IRR      | NIR      | Mean     |
| BH 1                                                          | 4.8±1.8  | 0.2± 0   | 2.5±0.9 | 0.0±0.0 | 0.0±0.0  | 0.0±0.0 | 0.4±0.0 | 0.4±0.0  | 0.4±0.0 | 0.0±0.0  | 0.0±0.0  | 0.0±0.0  |
| BH 2                                                          | 5.5±1.0  | 7.0±0.1  | 6.3±0.6 | 0.0±0.0 | 0.0±0.0  | 0.0±0.0 | 0.7±0.1 | 3.2±0.0  | 2.0±0.1 | 0.0±0.0  | 14.2±0.0 | 7.1±0.0  |
| BH 3                                                          | 0.3±0.0  | 1.1±0.4  | 0.7±0.2 | 0.0±0.0 | 0.0±0.0  | 0.0±0.0 | 0.3±0.1 | 0.3±0.0  | 0.3±0.1 | 0.0±0.0  | 0.3± 0.0 | 0.2±0    |
| BR 1                                                          | 0.0±0.0  | 0.9±0.0  | 0.5±0.0 | 0.0±0.0 | 0.0±0.0  | 0.0±0.0 | 0.0±0.0 | 0.0±0.0  | 0.0±0.0 | 0.8±0.2  | 1.1±0.1  | 0.6±0.2  |
| BR 2                                                          | 0.0±0.0  | 0.0±0.0  | 0.0±0.0 | 0.0±0.0 | 0.0±0.0  | 0.0±0.0 | 0.0±0.0 | 0.0±0.0  | 0.0±0.0 | 0.0±0.0  | 4.5 ±0.1 | 2.3±0.1  |
| BR 3                                                          | 0.2±0.0  | 4.1±0.0  | 2.1±0.0 | 0.0±0.0 | 0.0±0.0  | 0.0±0.0 | 0.3±0.1 | 0.0±0.0  | 0.2±0.1 | 0.5±0.0  | 1.9±0.7  | 1.2±0.4  |
| BR 4                                                          | 6.0±0.3  | 0.6±0.1  | 3.3±0.2 | 0.0±0.0 | 0.3±0.0  | 0.2±0   | 2.8±1.3 | 1.2±0.3  | 2.0±0.8 | 2.4±0.6  | 0.7±0.2  | 1.5±0.4  |
| BR 5                                                          | 5.1±2.7  | 7.4±0.4  | 6.2±1.6 | 1.3±0.3 | 0.0±0.0  | 0.7±0.2 | 0.8±0.0 | 13.5±0.7 | 7.2±0.4 | 4.8±0.8  | 6.1 ±0.3 | 5.5±0.6  |
| CCP 1                                                         | 0.2±0.0  | 0.5±0.2  | 0.4±0.3 | 0.2±0.0 | 0.3±0.1  | 0.3±0.1 | 0.5±0.0 | 0.0±0.0  | 0.3±0.0 | 0.0±0.0  | 0.0±0.0  | 0.0±0.0  |
| CCP 2                                                         | 0.0±0.0  | 1.5±0.0  | 0.8±0.0 | 0.0±0.0 | 0.4±0.2  | 0.2±0.1 | 0.0±0.0 | 0.0±0.0  | 0.0±0.0 | 0.0±0.0  | 0.0±0.0  | 0.0±0.0  |
| CCP 3                                                         | 8.7±2.1  | 0.4±0.1  | 4.6±1.1 | 0.0±0.0 | 0.6±0.5  | 0.3±0.3 | 0.4±0.1 | 0.3±0.0  | 0.4±0.1 | 0.0±0.0  | 17.0±8.5 | 8.5±4.3  |
| CCP 4                                                         | 0.4±0.0  | 0.5±0.1  | 0.4±0.1 | 0.4±0.0 | 2.2±0.1  | 1.3±0.1 | 0.0±0.0 | 0.0±0.0  | 0.0±0.0 | 2.3±0.2  | 0.0±0.0  | 1.2±0.1  |
| CV 1                                                          | 0.6±0.3  | 2.1±1.3  | 1.4±0.8 | 0.4±0.4 | 2.0±1.2  | 1.2±0.8 | 0.0±0.0 | 0.0±0.0  | 0.0±0.0 | 27.0±1.4 | 25.0±0.9 | 26.0±1.2 |
| CV 2                                                          | 0.8±0.1  | 8.0±6.5  | 4.4±3.3 | 1.3±1.0 | 3.5± 0.5 | 2.4±0.8 | 0.1±0.1 | 0.4±0.1  | 0.3±0.1 | 0.0±0.0  | 0.0±0.0  | 0.0±0.0  |
| CV 3                                                          | 3.3±1.1  | 11.7±5.2 | 7.5±3.2 | 0.6±0.2 | 3.4±0.3  | 2.0±0.3 | 0.4±0.4 | 0.0±0.0  | 0.2±0.2 | 0.4±0.4  | 0.0±0.0  | 0.2±0.1  |
| CV 4                                                          | 6.5±1.7  | 0.0±0.0  | 6.5±1.7 | 0.0±0.0 | 5.9±1.4  | 3.0±0.7 | 0.3±0.3 | 0.4±0.1  | 0.3±0.2 | 0.0±0.0  | 0.5±0.1  | 0.3±0.1  |
| CV 5                                                          | 3.2±0.1  | 0.8±0.0  | 2.0±0.5 | 8.3±1.5 | 8.6±4.2  | 8.5±2.9 | 0.4±0.3 | 0.3±0.1  | 0.3±0.2 | 0.0±0.0  | 0.0±0.0  | 0.0±0.0  |
| Mean                                                          | 2.7± 0.7 | 3.1±1.0  |         | 0.7±0.2 | 1.6±0.5  |         | 0.4±0.2 | 1.2±0.1  |         | 2.2±0.2  | 4.2±0.6  |          |
| Significancy of the differences by ANOVA Student–Newman–Keuls |          |          |         |         |          |         |         |          |         |          |          |          |
| IR                                                            |          | n.s.     |         |         | *        |         |         | *        |         |          | *        |          |
| GE                                                            |          | ***      |         |         | ***      |         |         | ***      |         |          | ***      |          |
| IR x GE                                                       |          | ***      |         |         | ***      |         |         | ***      |         |          | ***      |          |

**Table S3.** Variation in three aliphatic glucosinolates content ( $\mu\text{mol g}^{-1} \text{d.w.}$ ) in leaves in relation to the two experimental factors studied.

| Genotype | SIN        |             |            | GRA      |          |          | GNA     |          |          |
|----------|------------|-------------|------------|----------|----------|----------|---------|----------|----------|
|          | IRR        | NIR         | Mean       | IRR      | NIR      | Mean     | IRR     | NIR      | Mean     |
| BH 1     | 9.6±0.0    | 11.1±0.4    | 10.6±0.2   | 1.7±0.0  | 2.4±0.6  | 2.0±0.3  | 0.0±0.0 | 0.0±0.0  | 0.0±0.0  |
| BH 2     | 13.9±1.8   | 15.6±1.5    | 14.8±1.6   | 0.1±0.0  | 0.0±0.0  | 0.1±0.0  | 0.3±0.3 | 0.0±0.0  | 0.2±0.1  |
| BH 3     | 16.4±0.7   | 22.3±0.1    | 19.4±0.4   | 0.0±0.0  | 0.0±0.0  | 0.0±0.0  | 0.4±0.4 | 0.6±0.4  | 0.6±0.4  |
| BR 1     | 31.2±14.0  | 160.7±130.0 | 96.0±72.0  | 1.8±0.8  | 9.0±0.8  | 5.4±0.8  | 0.0±0.0 | 0.0±0.0  | 0±0.0    |
| BR 2     | 104.7±10.1 | 137.4±0.0   | 121.1±5.1  | 0.0±0.0  | 2.6±0.8  | 1.3±0.4  | 0.0±0.0 | 0.0±0.0  | 0±0.0    |
| BR 3     | 22.3±0.0   | 14.1±0.0    | 18.2±0.02  | 0.3±0.0  | 1.0±0.0  | 0.7±0.0  | 0.0±0.0 | 83.1±0.0 | 41.6±0.0 |
| BR 4     | 88.4±6.2   | 185.7±69.1  | 137.1±37.7 | 0.0±0.0  | 2.9±0.4  | 1.5±0.2  | 0.0±0.0 | 0.4±0.0  | 0.2±0.0  |
| BR 5     | 9.0±3.0    | 41.8±6.3    | 25.4±4.7   | 0.8±0.00 | 7.1±6.2  | 4.0±3.1  | 0.0±0.0 | 0.0±0.0  | 0±0.0    |
| CCP 1    | 12.1±0.0   | 0.0±0.0     | 6.1±0.0    | 1.2±0.0  | 0.0±0.0  | 0.6±0.0  | 0.0±0.0 | 0.0±0.0  | 0±0.0    |
| CCP 2    | 14.9±0.8   | 28.7±11.6   | 21.8±6.2   | 0.0±0.0  | 6.7±6.0  | 3.4±3.0  | 0.0±0.0 | 1.1±0.0  | 0.6±0.0  |
| CCP 3    | 6.9±1.0    | 4.6±1.2     | 5.8±1.1    | 5.4±3.8  | 1.3±0.3  | 3.4± 2.1 | 7.4±6.4 | 0.0±0.0  | 3.7±3.2  |
| CCP 4    | 4.1±1.8    | 4.1±1.8     | 4.1±1.8    | 1.0±0.1  | 1.0±0.0  | 1.0±0.1  | 0.0±0.0 | 0.3±0.0  | 0.15±0.0 |
| CV 1     | 1.1±1.0    | 6.8±0.0     | 4.1±0.5    | 7.0±7.0  | 1.7±1.0  | 4.3±3.9  | 0.0±0.0 | 0.2±0.0  | 0.1±0.0  |
| CV 2     | 1.9±0.3    | 1.9±0.0     | 1.9±0.2    | 0.0±0.0  | 0.2±0.0  | 0.1±0.0  | 0.0±0.0 | 0.5±0.0  | 0.3±0.0  |
| CV 3     | 0.7±0.0    | 0.0±0.0     | 0.4±0.0    | 0.0±0.0  | 0.0±0.0  | 0.0±0.0  | 0.5±0.0 | 0.0±0.0  | 0.3±0.0  |
| CV 4     | 3.7±2.3    | 1.8±0.4     | 2.8±1.3    | 1.0±0.5  | 0.0±0.0  | 0.5±0.3  | 0.0±0.0 | 0.0±0.0  | 0.0±0.0  |
| CV 5     | 1.9±0.0    | 140.1±0.0   | 71.0±0.0   | 0.2±0.0  | 36.4±0.0 | 18.3±0.0 | 0.5±0.0 | 20.4±0.0 | 10.5±0.0 |
| Mean     | 20.2±2.5   | 45.7±13.1   |            | 1.2±0.7  | 4.3±0.9  |          | 0.4±0.4 | 6.3±0.02 |          |

Significancy of the differences by ANOVA Student–Newman–Keuls

|         |      |     |     |
|---------|------|-----|-----|
| IR      | n.s. | **  | **  |
| GE      | ***  | *** | *** |
| IR x GE | ***  | *** | *** |

**Table S4.** Variation in other aliphatic glucosinolates content ( $\mu\text{mol g}^{-1} \text{d.w.}$ ) in leaves in relation to the two experimental factors studied.

| Genotype                                                      | GER              |                  |                  | GBN              |                 |                 | GAL            |                |                |
|---------------------------------------------------------------|------------------|------------------|------------------|------------------|-----------------|-----------------|----------------|----------------|----------------|
|                                                               | IRR              | NIR              | Mean             | IRR              | NIR             | Mean            | IRR            | NIR            | Mean           |
| BH 1                                                          | 89.0 $\pm$ 4.0   | 89.3 $\pm$ 4.3   | 93.7 $\pm$ 4.2   | 15.3 $\pm$ 1.1   | 9.1 $\pm$ 9.0   | 12.2 $\pm$ 4.4  | 0.0 $\pm$ 0.0  | 0.0 $\pm$ 0.0  | 0.0 $\pm$ 0.0  |
| BH 2                                                          | 1.5 $\pm$ 1.0    | 0.7 $\pm$ 0.0    | 1.5 $\pm$ 0.5    | 16.9 $\pm$ 4.2   | 0.0 $\pm$ 0.0   | 8.5 $\pm$ 0.1   | 6.4 $\pm$ 2.9  | 19.4 $\pm$ 0.1 | 12.9 $\pm$ 1.5 |
| BH 3                                                          | 0.4 $\pm$ 0.3    | 3.6 $\pm$ 0.0    | 0.2 $\pm$ 0.2    | 18.8 $\pm$ 9.5   | 18.0 $\pm$ 0.0  | 18.4 $\pm$ 0.6  | 10.9 $\pm$ 8.3 | 13.7 $\pm$ 0.0 | 12.3 $\pm$ 4.2 |
| BR 1                                                          | 129.4 $\pm$ 0.1  | 0.0 $\pm$ 0.0    | 64.7 $\pm$ 0.1   | 0.0 $\pm$ 0.0    | 0.0 $\pm$ 0.0   | 0.0 $\pm$ 0.0   | 0.0 $\pm$ 0.0  | 0.0 $\pm$ 0.0  | 0.0 $\pm$ 0.0  |
| BR 2                                                          | 137.4 $\pm$ 51.0 | 331.8 $\pm$ 0.2  | 234.6 $\pm$ 25.6 | 2.0 $\pm$ 1.9    | 36.1 $\pm$ 36.1 | 19.0 $\pm$ 24.1 | 1.7 $\pm$ 0.7  | 0.4 $\pm$ 0.0  | 1.1 $\pm$ 0.4  |
| BR 3                                                          | 3.8 $\pm$ 0.2    | 0.0 $\pm$ 0.0    | 1.9 $\pm$ 0.1    | 18.0 $\pm$ 0.0   | 0.0 $\pm$ 0.0   | 9.0 $\pm$ 0.4   | 13.5 $\pm$ 0.3 | 0.0 $\pm$ 0.0  | 6.8 $\pm$ 0.2  |
| BR 4                                                          | 0.0 $\pm$ 0.0    | 0.0 $\pm$ 0.0    | 0.0 $\pm$ 0.0    | 1.2 $\pm$ 1.0    | 0.5 $\pm$ 0.4   | 0.9 $\pm$ 0.5   | 1.0 $\pm$ 1.0  | 0.0 $\pm$ 0.0  | 0.6 $\pm$ 0.5  |
| BR 5                                                          | 0.5 $\pm$ 0.0    | 0.0 $\pm$ 0.0    | 0.3 $\pm$ 0.0    | 17.3 $\pm$ 0.3   | 14.2 $\pm$ 8.7  | 15.8 $\pm$ 2.2  | 6.0 $\pm$ 2.2  | 5.8 $\pm$ 4.0  | 5.9 $\pm$ 3.1  |
| CCP 1                                                         | 6.7 $\pm$ 0.0    | 0.0 $\pm$ 0.0    | 3.4 $\pm$ 0.0    | 18.6 $\pm$ 0.0   | 13.8 $\pm$ 0.7  | 16.2 $\pm$ 3.4  | 0.8 $\pm$ 0.0  | 77.8 $\pm$ 2.3 | 39.3 $\pm$ 1.2 |
| CCP 2                                                         | 2.4 $\pm$ 0.15   | 0.0 $\pm$ 0.0    | 1.2 $\pm$ 0.1    | 0.4 $\pm$ 0.0    | 10.1 $\pm$ 9.1  | 5.3 $\pm$ 6.8   | 8.8 $\pm$ 0.6  | 3.1 $\pm$ 2.3  | 6.0 $\pm$ 1.5  |
| CCP 3                                                         | 9.7 $\pm$ 9.0    | 111.2 $\pm$ 18.1 | 60.4 $\pm$ 13.6  | 14.1 $\pm$ 6.3   | 0.0 $\pm$ 0.0   | 7.0 $\pm$ 0.2   | 7.8 $\pm$ 7.0  | 0.0 $\pm$ 0.0  | 3.9 $\pm$ 3.5  |
| CCP 4                                                         | 1.1 $\pm$ 1.1    | 317.5 $\pm$ 14.3 | 159.3 $\pm$ 7.7  | 100.6 $\pm$ 27.6 | 7.4 $\pm$ 0.1   | 53.7 $\pm$ 65.5 | 0.4 $\pm$ 0.3  | 0.4 $\pm$ 0.4  | 0.4 $\pm$ 0.3  |
| CV 1                                                          | 60.6 $\pm$ 47.6  | 320.7 $\pm$ 0.6  | 190.7 $\pm$ 24.1 | 0.0 $\pm$ 0.0    | 7.6 $\pm$ 0.0   | 3.8 $\pm$ 0.2   | 0.0 $\pm$ 0.0  | 0.0 $\pm$ 0.0  | 0.0 $\pm$ 0.0  |
| CV 2                                                          | 0.0 $\pm$ 0.0    | 0.4 $\pm$ 0.0    | 0.2 $\pm$ 0.0    | 1.7 $\pm$ 0.2    | 0.3 $\pm$ 0.0   | 1.0 $\pm$ 0.9   | 1.1 $\pm$ 0.3  | 6.6 $\pm$ 0.1  | 3.9 $\pm$ 0.2  |
| CV 3                                                          | 0.5 $\pm$ 0.0    | 13.1 $\pm$ 0.0   | 6.8 $\pm$ 0.0    | 0.4 $\pm$ 0.0    | 0.0 $\pm$ 0.0   | 0.2 $\pm$ 0.1   | 1.5 $\pm$ 0.0  | 0.0 $\pm$ 0.0  | 0.8 $\pm$ 0.0  |
| CV 4                                                          | 3.3 $\pm$ 3.0    | 0.0 $\pm$ 0.0    | 1.7 $\pm$ 1.5    | 2.8 $\pm$ 2.2    | 1.7 $\pm$ 0.2   | 2.3 $\pm$ 0.8   | 4.0 $\pm$ 3.0  | 1.12 $\pm$ 0.4 | 2.6 $\pm$ 1.7  |
| CV 5                                                          | 6.6 $\pm$ 0.0    | 6.0 $\pm$ 0.0    | 6.3 $\pm$ 0.0    | 0.4 $\pm$ 0.0    | 0.8 $\pm$ 0.0   | 0.7 $\pm$ 0.4   | 1.6 $\pm$ 0.0  | 4.3 $\pm$ 0.0  | 3.0 $\pm$ 0.0  |
| Mean                                                          | 27.2 $\pm$ 6.9   | 74.4 $\pm$ 2.2   |                  | 13.4 $\pm$ 3.2   | 7.0 $\pm$ 3.8   |                 | 3.9 $\pm$ 1.6  | 7.8 $\pm$ 0.6  |                |
| Significancy of the differences by ANOVA Student–Newman–Keuls |                  |                  |                  |                  |                 |                 |                |                |                |
| IR                                                            | **               |                  |                  | n.s.             |                 |                 | n.s.           |                |                |
| GE                                                            | ***              |                  |                  | ***              |                 |                 | ***            |                |                |
| IR x GE                                                       | ***              |                  |                  | ***              |                 |                 | ***            |                |                |

**Table S5.** Variation in the indolic and aromatic glucosinolates content ( $\mu\text{mol g}^{-1} \text{ d.w.}$ ) in leaves in relation to the two experimental factors studied.

| Genotype                                                      | GBS        |            |            | NGBS      |           |          | SIB      |           |           | GST       |           |           |
|---------------------------------------------------------------|------------|------------|------------|-----------|-----------|----------|----------|-----------|-----------|-----------|-----------|-----------|
|                                                               | IRR        | NIR        | Mean       | IRR       | NIR       | Mean     | IRR      | NIR       | Mean      | IRR       | NIR       | Mean      |
| BH 1                                                          | 0.0±0.0    | 0.0±0.0    | 0.0±0.0    | 0.0±0.0   | 3.6±3.5   | 1.8±1.7  | 0.0±0.0  | 0.8±0.7   | 0.4±0.4   | 7.2±0.0   | 10.1±4.1  | 8.6±2.1   |
| BH 2                                                          | 3.3±2.1    | 38.0±0.2   | 20.6±1.2   | 0.0±0.0   | 0.0±0.0   | 0.0±0.0  | 3.0±2.4  | 1.9±0.0   | 2.5±1.2   | 3.0±2.4   | 1.2±0.0   | 2.1±1.2   |
| BH 3                                                          | 6.3±6.0    | 10.8±2.7   | 8.6±3.4    | 0.6±0.5   | 0.0±0.0   | 0.3±0.3  | 5.3±3.2  | 1.3±0.1   | 3.3±1.7   | 0.6±0.0   | 12.1±0.0  | 6.4±0.0   |
| BR 1                                                          | 0.0±0.0    | 0.0±0.0    | 0.0±0.0    | 0.0±0.0   | 0.0±0.0   | 0.0±0.0  | 0.0±0.0  | 1.61±0.6  | 0.8±0.3   | 22.0± 0.0 | 0.0±0.0   | 11.0±0.0  |
| BR 2                                                          | 0.0±0.0    | 7.6±0.1    | 3.8±0.1    | 19.0±18.0 | 0.0±0.0   | 9.5±9.0  | 0.0±0.0  | 0.0±0.0   | 0±0.0     | 26.7±9.7  | 63.0±3.3  | 44.9±6.5  |
| BR 3                                                          | 10.9±2.6   | 0.0±0.0    | 5.5±1.3    | 0.0±0.0   | 0.0±0.0   | 0.0±0.0  | 0.7± 0.6 | 0.0±0.0   | 0.4±0.3   | 12.1±0.0  | 0.0±0.0   | 6.1±0.0   |
| BR 4                                                          | 118.0±10.1 | 125.3±99.6 | 121.7±54.9 | 6.1±6.0   | 1.6±1.0   | 3.9±3.5  | 7.4±7.0  | 20.1±19.7 | 13.8±13.4 | 0.0±0.0   | 0.0±0.0   | 0.0±0.0   |
| BR 5                                                          | 0.7±0.1    | 0.0±0.0    | 0.35±0.1   | 0.0±0.0   | 0.0±0.0   | 0.0±0.0  | 3.2±2.1  | 1.0±1.0   | 2.1±1.6   | 2.2±0.7   | 2.8±0.0   | 2.5±0.4   |
| CCP 1                                                         | 0.8±0.0    | 0.0±0.0    | 0.4±0.3    | 0.0±0.0   | 1.0±0.9   | 0.5±0.4  | 5.7±0.0  | 0.0±0.0   | 2.9±0.0   | 3.0±0.0   | 6.8±2.5   | 4.9±1.3   |
| CCP 2                                                         | 10.2±1.0   | 0.7±0.6    | 5.6±0.8    | 0.0±0.0   | 14.2±14.0 | 7.1±7    | 0.7±0.1  | 1.6±0.4   | 1.2±0.3   | 7.9±0.5   | 0.0±0.0   | 4.0±0.25  |
| CCP 3                                                         | 11.4±10.8  | 7.1±0.0    | 9.3±5.4    | 21.0±3.3  | 0.0±0.0   | 10.5±1.7 | 6.9±5.5  | 0.0±0.0   | 3.5±2.8   | 13.1±13.0 | 14.5± 7.3 | 13.8±10.2 |
| CCP 4                                                         | 0.0±0.0    | 0.0±0.0    | 0.0±0.0    | 0.0±0.0   | 3.9±3.0   | 1.9±1.5  | 0.2±0.1  | 0.74±0.7  | 0.5±0.4   | 8.0±6.8   | 63.0±3.3  | 35.5±5.1  |
| CV 1                                                          | 39.9±29.0  | 0.0±0.0    | 20.0±14.5  | 1.0±0.9   | 9.7±3.6   | 5.4±2.3  | 0.12±0.0 | 1.7±1.4   | 0.9±0.7   | 2.2±2.0   | 65.0± 2.3 | 18.6±2.2  |
| CV 2                                                          | 0.0±0.0    | 4.2±2.6    | 2.1±1.3    | 62.2±7.4  | 63.6±5.6  | 62.9±6.4 | 0.0±0.0  | 0.83±0.0  | 0.4±0.0   | 0.0±0.0   | 0.0±0.0   | 0±0.0     |
| CV 3                                                          | 23.7±0.0   | 68.9±0.0   | 46.3±0.0   | 4.3±0.0   | 1.81±0.0  | 3.1±0.0  | 0.9±0.0  | 0.0±0.0   | 4.5±0.0   | 3.3±0.0   | 4.3±0.0   | 3.8±0.0   |
| CV 4                                                          | 12.4±5.2   | 0.0±0.0    | 6.2±2.6    | 7.8± 6.3  | 62.2±7.4  | 35±6.9   | 3.75±2.7 | 0.0±0.0   | 1.9±1.4   | 0.0±0.0   | 0.0±0.0   | 0±0.0     |
| CV 5                                                          | 0.3±0.0    | 1.1±0.0    | 0.7±0.0    | 69.0±0.0  | 27.3±0.0  | 48.2±0.0 | 0.0±0.0  | 0.2±0.0   | 0.1±0.0   | 34.0±0.0  | 9±0.0     | 21.5±0.0  |
| Mean                                                          | 14.1±3.9   | 15.5±6.1   |            | 10.7±21.5 | 11.1±2.3  |          | 2.7±1.4  | 1.9±1.4   |           | 8.5±2.1   | 13.0±1.3  |           |
| Significancy of the differences by ANOVA Student–Newman–Keuls |            |            |            |           |           |          |          |           |           |           |           |           |
| IR                                                            | n.s.       |            |            | n.s.      |           |          | n.s.     |           |           | *         |           |           |
| GE                                                            | ***        |            |            | ***       |           |          | **       |           |           | ***       |           |           |
| IR x GE                                                       | ***        |            |            | ***       |           |          | ***      |           |           | ***       |           |           |
